# Supplementary material
Source: MDPI journal article supplement (https://www.mdpi.com/2673-9879/3/1/8)
Supplement: s1 [file s1]

**Table S1:** Validated *acute* treatment outcome questionnaire.

| Questionnaire                                                | N Items | Scoring                                                                                                                 | Assessment Period                                                | Assessment                                                                                                           | Item Examples                                                                                                                                                                                                    |
|--------------------------------------------------------------|---------|-------------------------------------------------------------------------------------------------------------------------|------------------------------------------------------------------|----------------------------------------------------------------------------------------------------------------------|------------------------------------------------------------------------------------------------------------------------------------------------------------------------------------------------------------------|
| <b>Migraine Treatment Optimization Questionnaire (mTOQ)</b>  | 19-item | Yes / No                                                                                                                | Past 4 weeks                                                     | Assess efficacy on four aspects of treatment response                                                                | <i>“Are you able to function normally within 2 hours after taking your migraine medication?”</i><br><i>“Are you able to resume your normal activities within 2 hours after taking your migraine medication?”</i> |
| <b>Migraine Assessment of Current Therapy (Migraine-ACT)</b> | 4-item  | Yes / No                                                                                                                | Previous attacks treated with a new drug                         | Assessment of the efficacy of a recently prescribed medication to identify patients who require a change in the drug | <i>“Does your migraine medication work consistently, in the majority of your attacks?”</i><br><i>“Does the headache pain disappear within 2 hours?”</i>                                                          |
| <b>Patient Perception of Migraine Questionnaire (PPMQ-R)</b> | 32-item | 7-point Likert scale (from “Very satisfied” to “Very dissatisfied”); 5-point Likert scale (“Not at all” to “Extremely”) | Single-attack and multiple-attack evaluation                     | Patient satisfaction with acute medication (efficacy, functionality, ease of use, cost, side-effects)                | <i>“How well the medication relieves migraine pain?”</i><br><i>“How fast the medication relieves migraine pain?”</i>                                                                                             |
| <b>Functional Impairment Scale (FIS)</b>                     | 4-item  | 4-point Likers scale (normal, mild, moderate or severe impairment)                                                      | Up to 2 hours from the drug intake, before any rescue medication | Assessment of impairment of daily activity secondary to headache and associated symptoms                             | <i>“Are you able to function normally?”</i>                                                                                                                                                                      |

**Table S2:** Validated *preventive* treatment outcome questionnaire.

| Questionnaire                                           | N Items | Scoring                                                                                                                        | Assessment Period                    | Assessment                                                   | Item Examples                                                                                                                                                                                                              |
|---------------------------------------------------------|---------|--------------------------------------------------------------------------------------------------------------------------------|--------------------------------------|--------------------------------------------------------------|----------------------------------------------------------------------------------------------------------------------------------------------------------------------------------------------------------------------------|
| <b>Headache Impact Test (HIT)</b>                       | 6-item  | 5-point Likert scale (never, rarely, sometimes, very Often, always)                                                            | Past 4 weeks                         | Interference with activities                                 | <p><i>“When you have headaches, how often is the pain severe?”</i></p> <p><i>“When you have headache, how often you wish you could lie down?”</i></p>                                                                      |
| <b>Migraine Disability Assessment (MIDAS)</b>           | 7-item  | Number of days (0-30); 0-10 Numerical Rating Scale                                                                             | Past 30 days                         | Disability in carrying daily activities, work, social events | <p><i>“On how many days in the last 30 days did you have a headache?”</i></p> <p><i>“On how many days in the last 30 days did you miss family, social or leisure activities because of your headache?”</i></p>             |
| <b>Patient Global Impression of Change Scale (PGIC)</b> | 1-item  | 7-point scale (very much improved, much improved, minimally improved, no change, minimally worse, much worse, very much worse) | Since the beginning of the treatment | Patient’s belief about the efficacy of treatment             | <p><i>“Since beginning treatment at this facility, how would you describe the change (if any) in activity limitations, symptoms, emotions and overall quality of life, related to your post-concussive condition?”</i></p> |
| <b>Migraine Functional Impact Questionnaire (MFIQ)</b>  | 31-item | 5-point response scale (minimal/mild impact, moderate                                                                          | Past 7 days                          | Impact on Physical Function (PF), Social Function (SF),      | <p><i>“How difficult is to get ready for the day, do usual activities,</i></p>                                                                                                                                             |

|                                                                 |         |                                                                                                                                                                                                                                                   |               |                                                                                                                |                                                                                                                                                                                                                               |
|-----------------------------------------------------------------|---------|---------------------------------------------------------------------------------------------------------------------------------------------------------------------------------------------------------------------------------------------------|---------------|----------------------------------------------------------------------------------------------------------------|-------------------------------------------------------------------------------------------------------------------------------------------------------------------------------------------------------------------------------|
|                                                                 |         | impact, severe impact)                                                                                                                                                                                                                            |               | Usual Activities (UA), and Emotional Function (EF)                                                             | <i>activities with others”?</i>                                                                                                                                                                                               |
| <b>Migraine-Specific Quality of Life version 2.1 (MSQ v2.1)</b> | 14-item | 6-point Likert scale                                                                                                                                                                                                                              | Past 4 weeks  | Impact of migraine on health-related quality of life                                                           | <i>“Have migraines interfered with how well you dealt with family, friends, and others who are close to you?”</i>                                                                                                             |
| <b>Migraine Physical Function Impact Diary (MPFID)</b>          | 13-item | 5-point response scale (minimal, impact <50, mild impact 50-55, moderate impact 56-59, severe impact >59, missing)                                                                                                                                | Past 24 hours | Subjective impact of migraine on physical functioning (everyday activities (EA), and physical impairment (PI)) | <i>“In the last 24 hours do you recall difficulty doing household chores?”</i>                                                                                                                                                |
| <b>Work Productivity and Activity Impairment (WPAI)</b>         | 6-item  | 4 metrics: absenteeism (percentage of work time missed), presenteeism (percentage of impairment experienced while at work), overall work productivity loss (an overall impairment estimate), and activity impairment (percentage of impairment in | Past 7 days   | Measure impairment in work and activities                                                                      | <i>“During the past seven days, how many hours did you miss from work because of your health problems? Include hours you missed on sick days, times you went in late, left early, etc., because of your health problems.”</i> |

|  |  |                      |  |  |  |
|--|--|----------------------|--|--|--|
|  |  | daily<br>activities) |  |  |  |
|--|--|----------------------|--|--|--|
